# Supplementary material for: Temperature Effects on Expression Levels of hsp Genes in Eggs and Second-Stage Juveniles of Meloidogyne hapla Chitwood, 1949
Source: MDPI journal article supplement (doi:10.3390/ijms25094867), 2024-04-29
Supplement: s1 [file s1]

**Table S1.** List of primers used in the study (F–Forward primer, R–Reverse primer).

| Gen               | Position in gene | Primer sequence (5'-3')     | Amplicon size (bp) | Annealing temperature (°C) | Author of primer |
|-------------------|------------------|-----------------------------|--------------------|----------------------------|------------------|
| <i>Mh-hsp90</i>   | 1391-1412        | F: TCTCTGATGATGAGGCTGAAGA   | 130                | 60.1                       | [27]             |
|                   | 1553-1572        | R: TCACCGTCCTTCTTGTCCTT     |                    | 59.7                       |                  |
| <i>Mh-hsp1</i>    | 1410-1431        | F: ACTCATCTTGGTGGTGAAGATT   | 200                | 57.4                       | [27]             |
|                   | 1671-1694        | R: TCAATGCCATCAAAGAGAGAATCA |                    | 57.4                       |                  |
| <i>Mh-hsp4</i>    | 1866-1885        | F: GAAGGAGAACGCCCAATGAC     | 158                | 58.9                       | this article     |
|                   | 2046-2065        | R: CCAGTTCCTTTGTCTTCGGC     |                    | 58.9                       |                  |
| <i>Mh-hsp6</i>    | 15-34            | F: TCGTCCATCTTTCAACCGTT     | 218                | 58.1                       | this article     |
|                   | 310-332          | R: AACAGATTGTCTAATTGCTGGAG  |                    | 58.2                       |                  |
| <i>Mh-hsp60</i>   | 909-929          | F: TTCCTGCTCTTGAATTGGCT     | 218                | 58.1                       | [27]             |
|                   | 1250-1269        | R: AATTGTGACTTCATCCGCCT     |                    | 58.2                       |                  |
| <i>Mh-dnj19</i>   | 983-1002         | F: TGTGAACATTGCAGTGGTGG     | 185                | 58.0                       | this article     |
|                   | 1191-1210        | R: TCTCCAGGCTCAATTCCAGG     |                    | 59.1                       |                  |
| <i>Mh-hsp43</i>   | 4156-4178        | F: CGTAGAGAAGAATTCGTGAAGA   | 138                | 58.7                       | [27]             |
|                   | 4407-4425        | R: TTCAGAGCGGTGACTTCCA      |                    | 59.2                       |                  |
| <i>Mh-hsp12.2</i> | 709-728          | F: GCCCCTTCAACACACAGATG     | 156                | 59.1                       | this article     |
|                   | 888-907          | R: TACCCTTTCGTGGCTCATGA     |                    | 58.7                       |                  |
